# Supplementary material
Source: MDPI journal article supplement (https://www.mdpi.com/2673-8007/2/2/25)
Supplement: s1 [file s1]

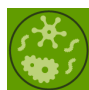

## Article

# Response of Prokaryotic Communities to Freshwater Salinization

Jean-Christophe Gagnon <sup>1,2</sup>, Louis Astorg <sup>1,2</sup>, Alison M. Derry <sup>1,2</sup> and Cassandre Sara Lazar <sup>1,2,\*</sup><sup>1</sup> Department of Biological Sciences, University of Québec at Montréal, Montréal QC Canada<sup>2</sup> Interuniversity Research Group in Limnology / Groupe de recherche interuniversitaire en limnologie (GRIL)

\* Correspondence: lazarcassandre@uqam.ca. Tel.: +1-(514)-987-3000 (ext. 3963)

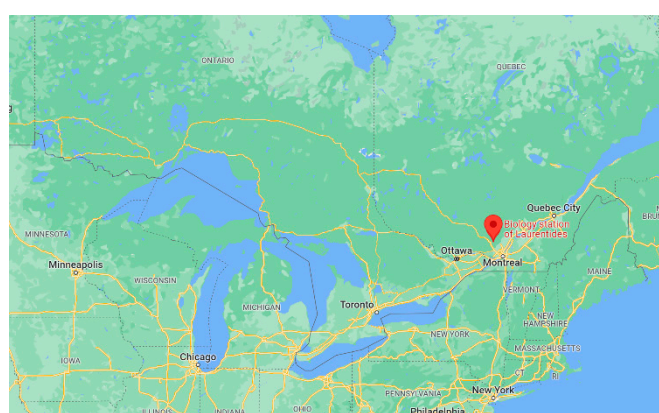

(a)

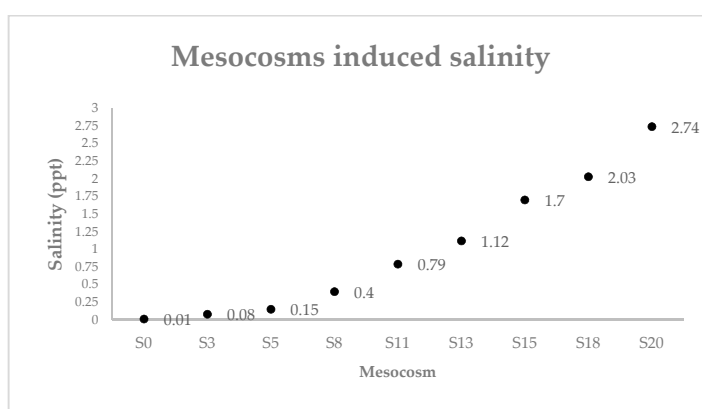

(b)

**Figure S1.** (a) Location of the Laurentians Biological Station, Quebec, Canada, site of the mesocosm installations. (b) Salinity levels in the mesocosms.

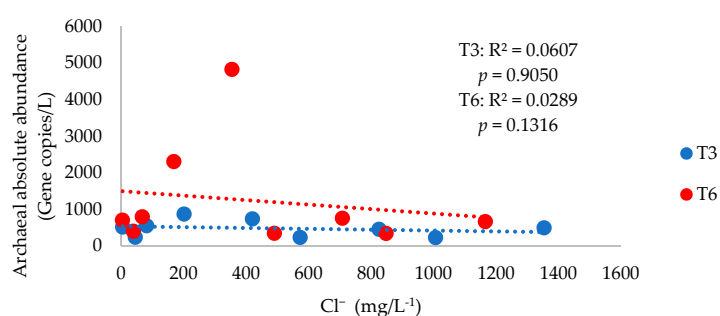

(a)

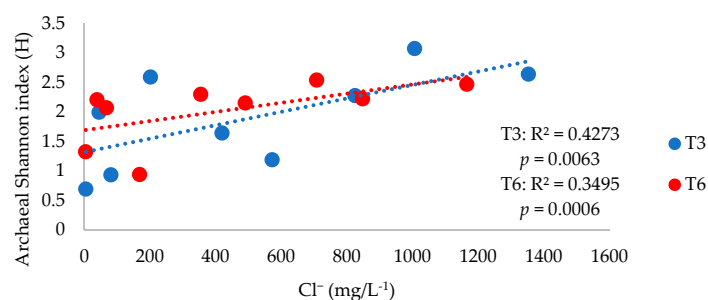

(b)

**Figure S2. (a)** Regression of archaeal absolute abundance and chloride ( $\text{Cl}^-$ ) in mesocosms at T3 and T6 **(b)** Regression of archaeal diversity indices (Shannon's H) and  $\text{Cl}^-$  in mesocosms at T3 and T6.

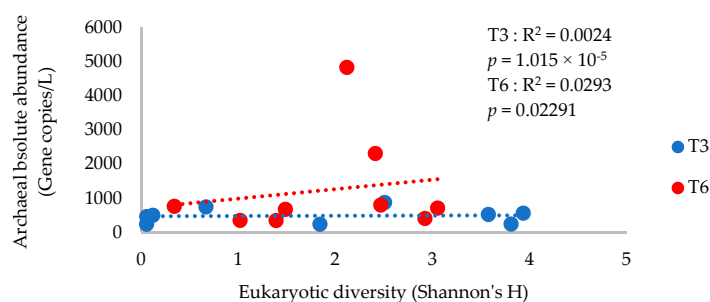

(a)

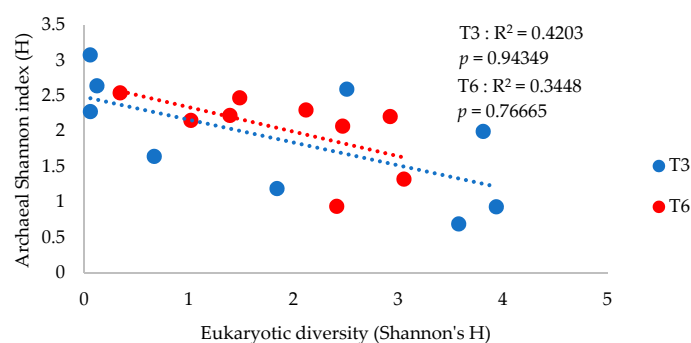

(b)

**Figure S3. (a)** Regression of archaeal absolute abundance and eukaryotic diversity (Shannon's H) in mesocosms at T3 and T6. **(b)** Regression of archaeal diversity (Shannon's H) and eukaryotic diversity (Shannon's H) in mesocosms at T3 and T6

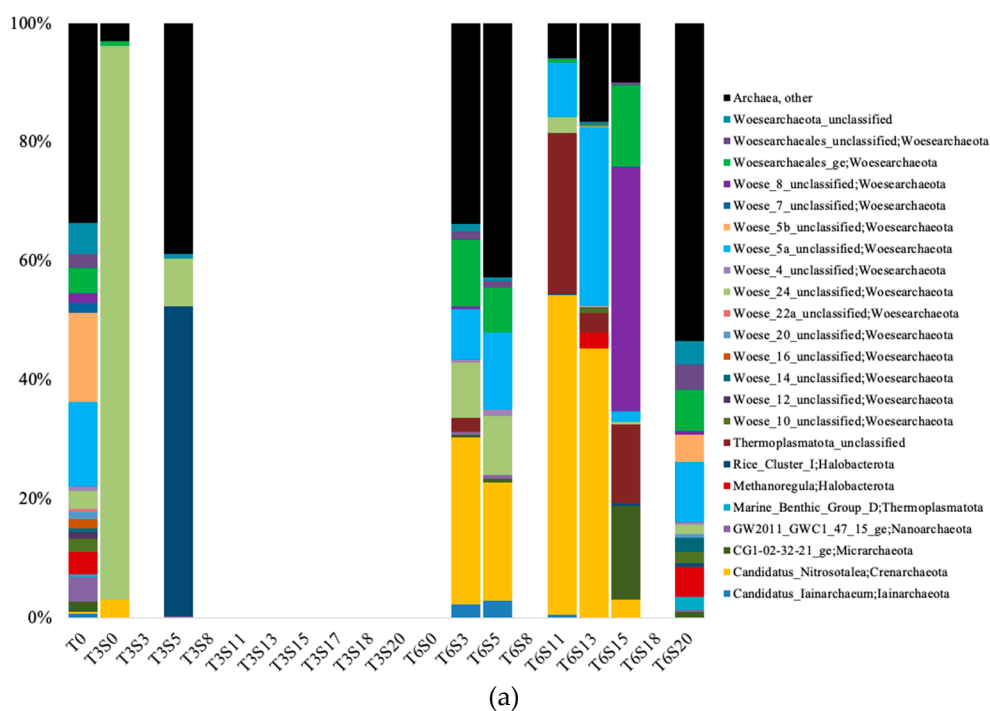

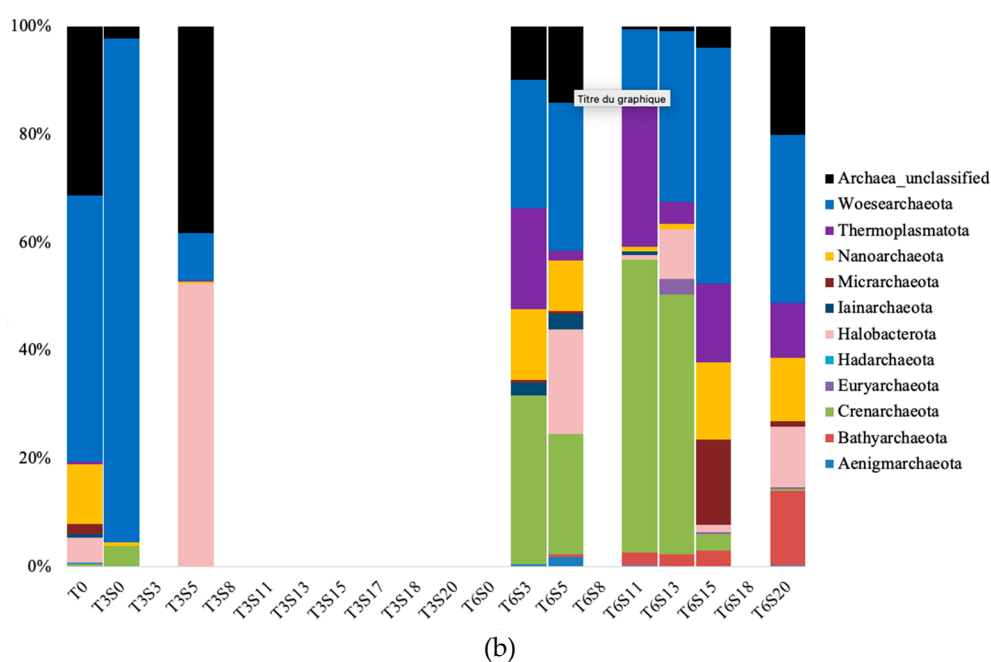

**Figure S4.** Taxonomical classification of the archaeal 16S rRNA genes based on the SILVA database v.138 (Glöckner, Bremen, Germany). (a) Genus-level identification and ; (b) Phylum-level identification.

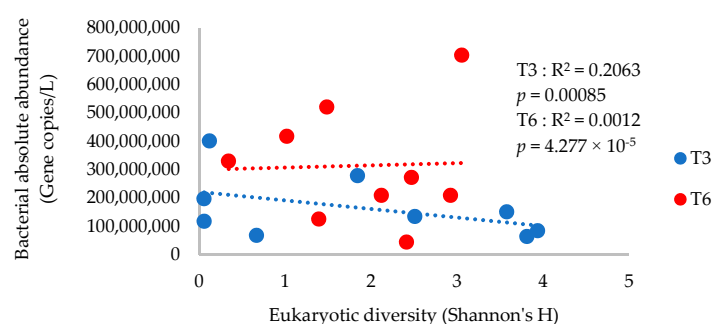

(a)

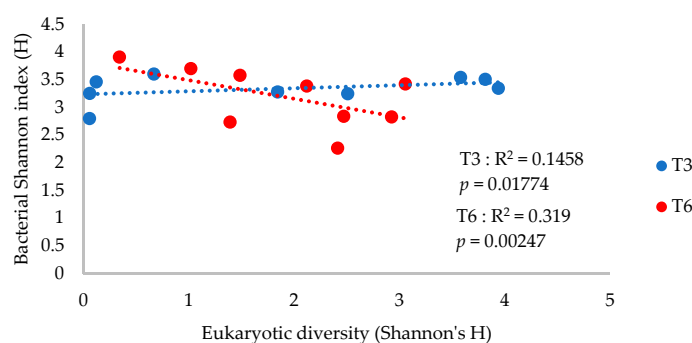

(b)

**Figure S5.** (a) Regression of bacterial absolute abundance and eukaryotic diversity (Shannon's H) in mesocosms after three (T3) and six (T6) week incubation. (b) Regression of bacterial diversity (Shannon's H) and eukaryotic diversity (Shannon's H) in mesocosms after three (T3) and six weeks (T6) exposition.

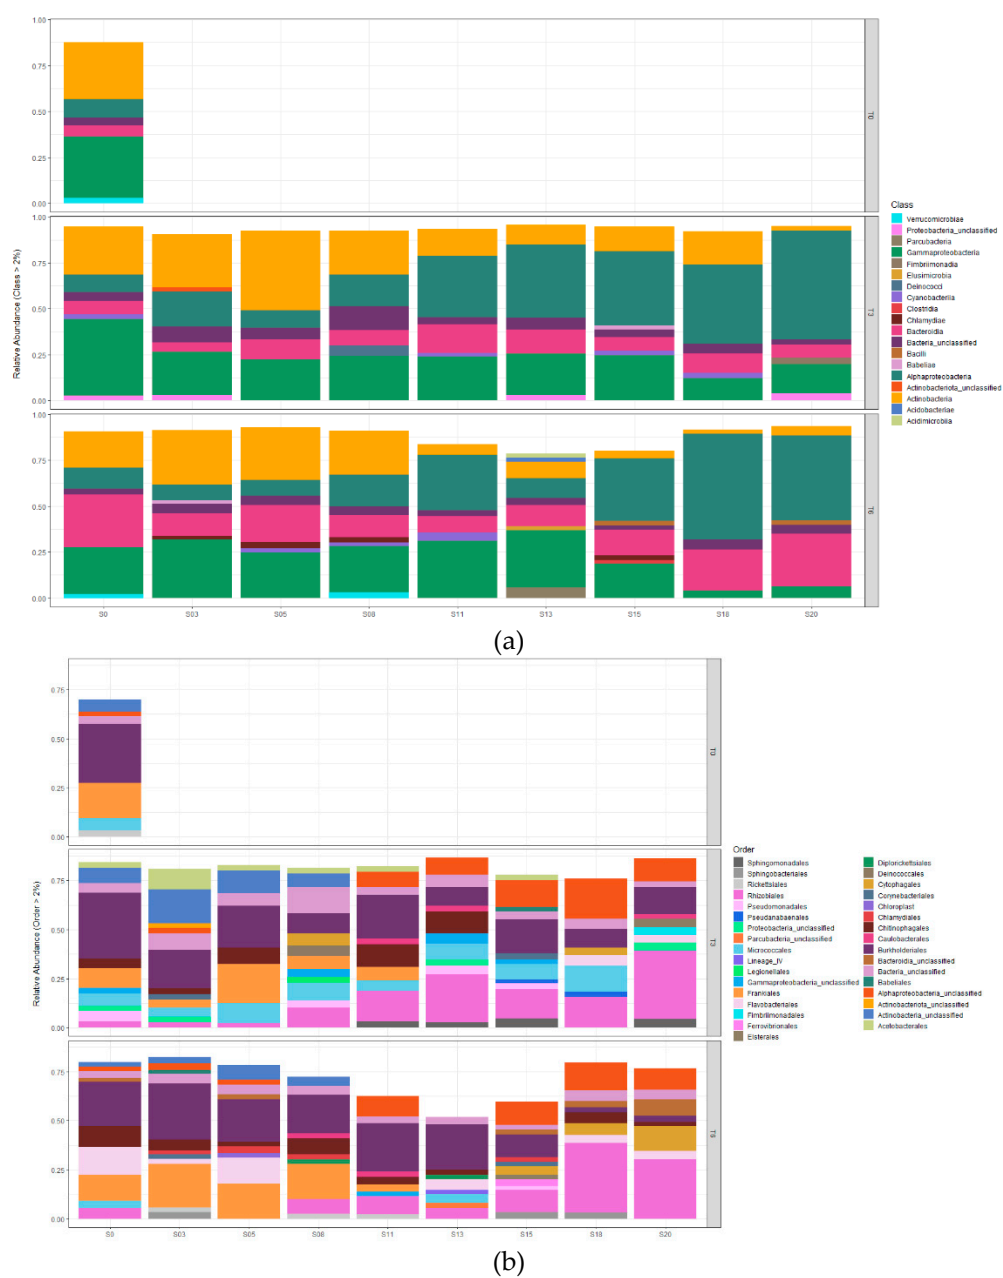

**Figure S6.** Composition of bacterial communities representing a total of more than 2% at the level of **(a)** Classes and ; **(b)** Orders.

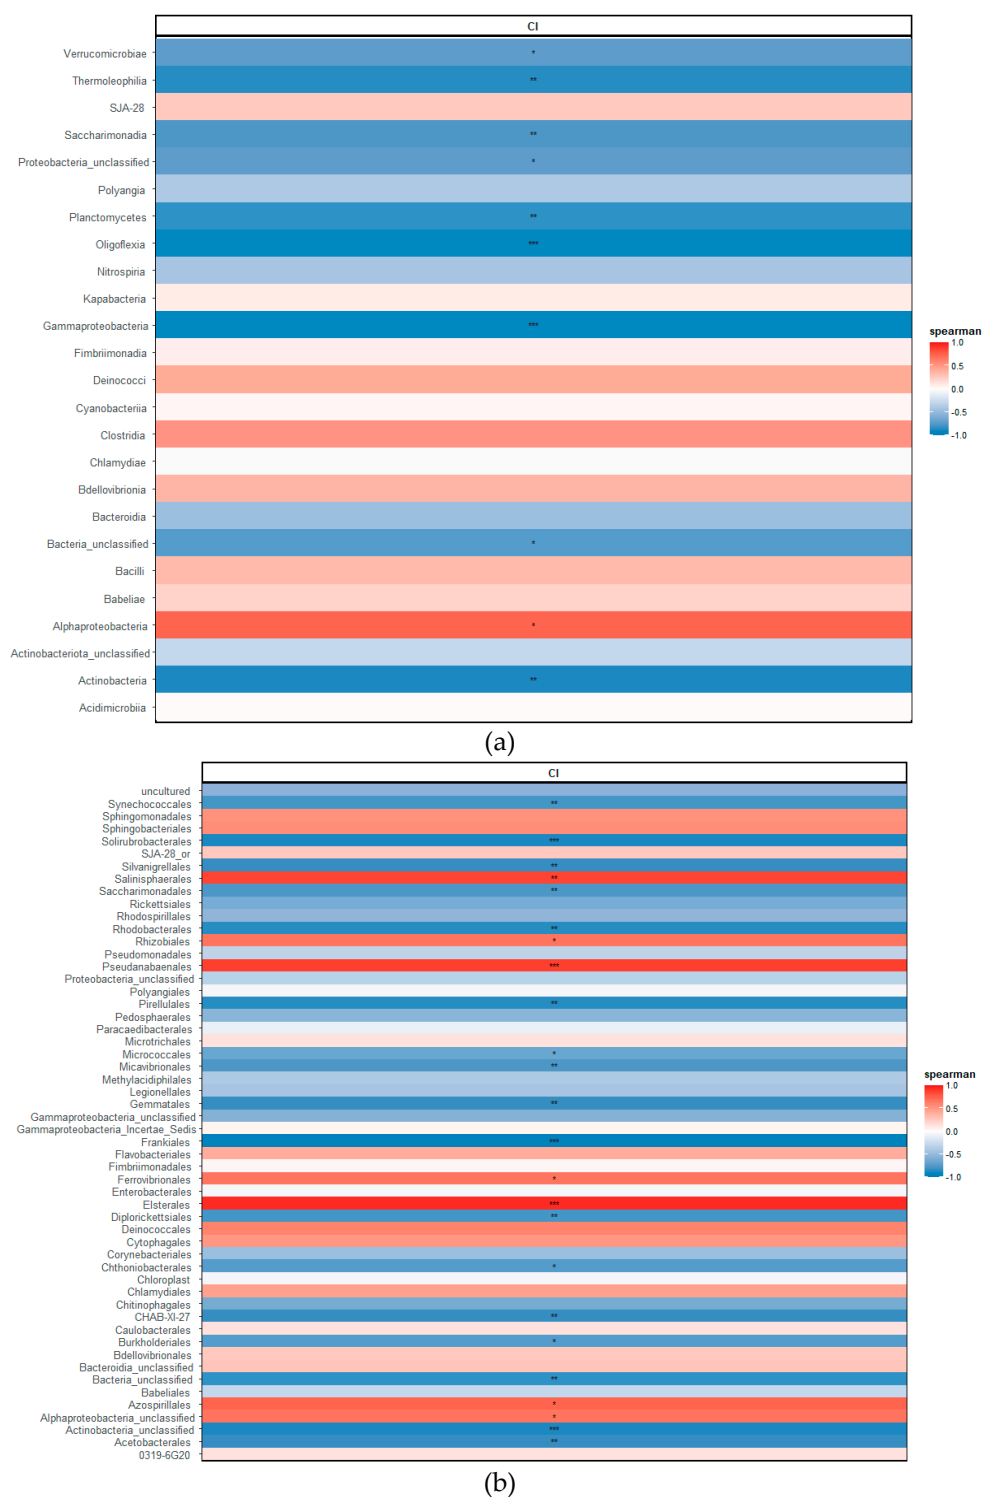

**Figure S7.** Heatmap of correlations (Spearman) between CI- values and the most abundant **(a)** classes and **(b)** order, representing the 500 most abundant taxa, in the mesocosms, after three (T3) weeks incubation. None of the classes present showed significance after six (T6) weeks incubation, and were therefore not shown in the figure.

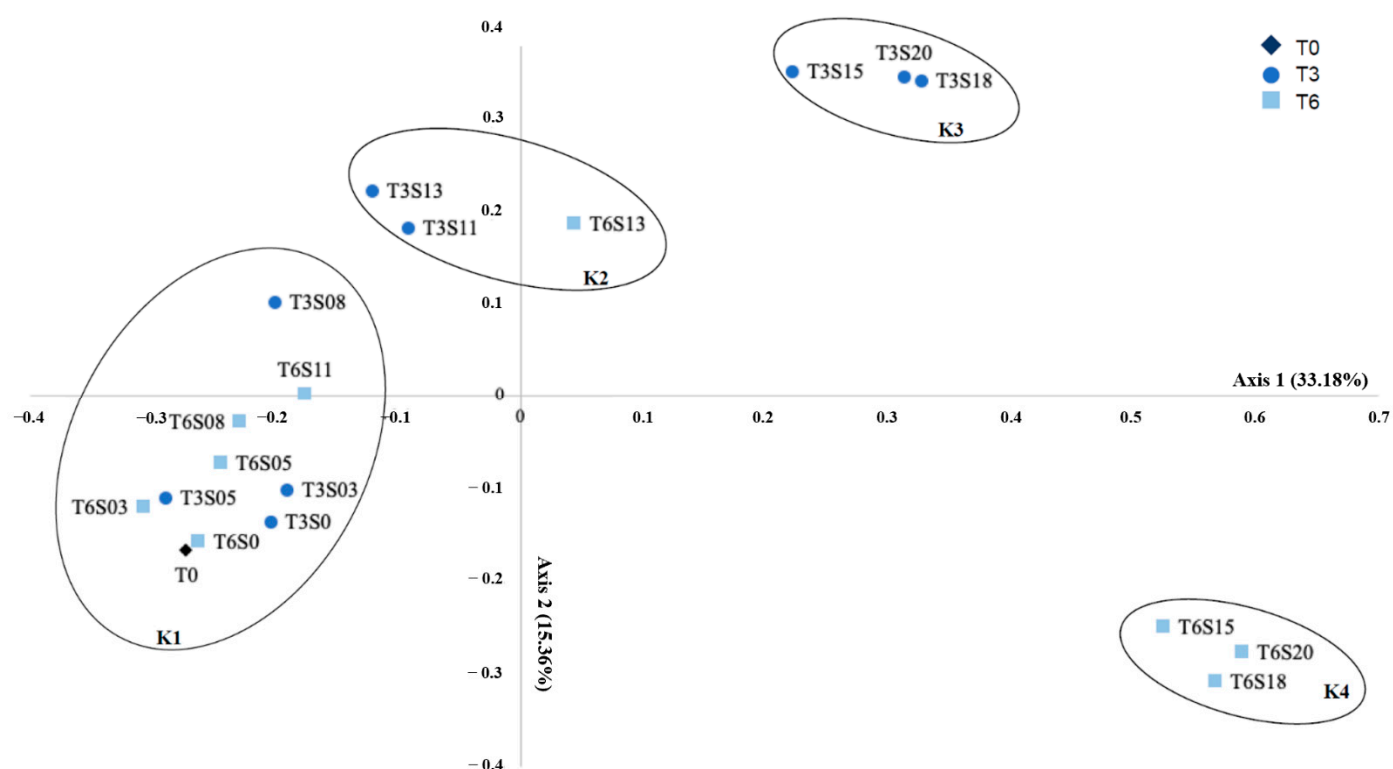

**Figure S8.** Principal coordinate analysis based on a distance matrix between bacterial mesocosm communities. Variance explained by each axis is shown with the axis label. T3, 3 weeks exposure to the salinity gradient; T6, 6 weeks exposure.

**Table S1.** Table of the reaction mixture used for each chip in the context of PCRd.

| Material                                | Volume per chip (μL) | Final concentration |
|-----------------------------------------|----------------------|---------------------|
| QuantStudio™ 3D Digital PCR Master Mix  | 7.25                 | 1X                  |
| 20X SYBR Green 1 dye in TE buffer, pH 8 | 1.45                 | 2X                  |
| Forward and reverse primer              | 0.3                  | 200nM               |
| cDNA sample                             | 1                    | 50ng total          |
| Water                                   | Bring to 14.5        | -                   |

**Table S2.** Table of steps carried out during digital polymerase chain reaction (dPCR), depending on the primers used. The phases, temperatures, times and number of cycles are presented.

| Eukaryotic primers E960F - NSR1438R |                      |             |                  |                  |
|-------------------------------------|----------------------|-------------|------------------|------------------|
|                                     | Phase                | Temperature | Number of cycles | Number of cycles |
| Step 1                              | Initial denaturation | 96°C        | 00:10:00         | 1X               |
| Step 2                              | Denaturation         | 58°C        | 00:02:00         | 39X              |
|                                     | Hybridization        | 98°C        | 00:00:30         |                  |
|                                     | Elongation           | 60°C        | 00:02:00         |                  |
| Step 3                              | Conservation         | 10°C        | ∞                | 1X               |

| Bacterial primers B341F - B785R |                      |             |                  |                  |
|---------------------------------|----------------------|-------------|------------------|------------------|
|                                 | Phase                | Temperature | Number of cycles | Number of cycles |
| Step 1                          | Initial denaturation | 96°C        | 00:10:00         | 1X               |
| Step 2                          | Denaturation         | 56°C        | 00:02:00         | 39X              |
|                                 | Hybridization        | 98°C        | 00:00:30         |                  |
|                                 | Elongation           | 60°C        | 00:02:00         |                  |
| Step 3                          | Conservation         | 10°C        | ∞                | 1X               |
| Archaeal primers A340F - A915R  |                      |             |                  |                  |
|                                 | Phase                | Temperature | Number of cycles | Number of cycles |
| Step 1                          | Initial denaturation | 96°C        | 00:10:00         | 1X               |
| Step 2                          | Denaturation         | 58°C        | 00:02:00         | 39X              |
|                                 | Hybridization        | 64°C        | 00:00:30         |                  |
|                                 | Elongation           | 60°C        | 00:02:00         |                  |
| Step 3                          | Conservation         | 10°C        | ∞                | 1X               |

**Table S3.** Water physico-chemical values measured using a YSI multi-parameter probe in the different mesocosms, at the beginning of the incubation, with measured Cl<sup>-</sup> values, at T0.

| Sample | Temp (°C) | Cond (SPC) | Sal (ppt) | pH   | DO (%) | Measured Cl <sup>-</sup> (mg/L <sup>-1</sup> ) |
|--------|-----------|------------|-----------|------|--------|------------------------------------------------|
| S0     | 21.3      | 17.4       | 0.01      | 6.26 | 99     | 0.265                                          |
| S3     | 21.3      | 168.9      | 0.08      | 6.45 | 98.8   | 39.905                                         |
| S5     | 21.3      | 305.5      | 0.15      | 6.68 | 99.3   | 106.675                                        |
| S8     | 21.3      | 806        | 0.4       | 6.76 | 99.3   | 202.715                                        |
| S11    | 21.4      | 1564       | 0.79      | 6.45 | 100.8  | 351.365                                        |
| S13    | 21.3      | 2191       | 1.12      | 6.45 | 100.5  | 455.585                                        |
| S15    | 21.4      | 2283       | 1.7       | 6.42 | 100.7  | 511.225                                        |
| S18    | 21.4      | 3845       | 2.03      | 6.38 | 102.1  | 875.93                                         |
| S20    | 21.4      | 5096       | 2.74      | 6.31 | 101.9  | 1110.86                                        |

**Table S4.** Biotic and abiotic factor values used to carry out multivariate analyses, shown for every sample, composing the different mesocosms at the different incubation times. For T3 and T6 samples, Cl<sup>-</sup> values were calculated following a linear regression using Cl<sup>-</sup> and conductivity ( $y = 1 \times 10^{-20} * x^3 + 0.0000000000000001 * x^2 + 0.2279 * x$ ).

| Sample | Sampling<br>(week) | time<br>Temp. (°C) | pH   | Cl <sup>-</sup> (mg/L <sup>-1</sup> ) | Total phosphorus<br>(µg.L <sup>-1</sup> ) | Dissolved oxygen<br>(%) | Bacterial abundance<br>(Gene copies/L) | Eucaryotic abundance<br>(Gene copies/L) | Archaeal abundance<br>(Gene copies/L) | Eukaryotic diversity<br>(H) | Archaeal diversity<br>(H) | Bacterial diversity<br>(H) |
|--------|--------------------|--------------------|------|---------------------------------------|-------------------------------------------|-------------------------|----------------------------------------|-----------------------------------------|---------------------------------------|-----------------------------|---------------------------|----------------------------|
| T0     | 0                  | 21.3               | 6.26 | 0.27                                  | 3.574                                     | 99                      | 111549000                              | 12319200                                | 1578                                  | 3.793332                    | 4.883306                  | 3.650698                   |

|       |   |      |      |         |       |       |           |           |        |          |          |          |
|-------|---|------|------|---------|-------|-------|-----------|-----------|--------|----------|----------|----------|
| T3S0  | 3 | 24.2 | 7.28 | 4.71753 | 2.945 | 96.3  | 150300000 | 17022000  | 514.8  | 3.579116 | 0.685688 | 3.537383 |
| T3S03 | 3 | 24.2 | 7.26 | 45.3749 | 5.31  | 96.6  | 63334500  | 1539750   | 234    | 3.812996 | 1.99047  | 3.504182 |
| T3S05 | 3 | 24.2 | 7.17 | 81.4743 | 7.23  | 96.2  | 83961000  | 2110800   | 552.6  | 3.938634 | 0.926154 | 3.341875 |
| T3S08 | 3 | 24.3 | 6.98 | 201.692 | 4.033 | 97.3  | 133900500 | 2299875   | 870    | 2.508806 | 2.588274 | 3.242708 |
| T3S11 | 3 | 24.5 | 6.7  | 420.02  | 7.36  | 96.8  | 67179000  | 29994900  | 738    | 0.668207 | 1.637801 | 3.598676 |
| T3S13 | 3 | 24.3 | 6.77 | 572.713 | 8.38  | 94.4  | 277905000 | 19275000  | 229.8  | 1.842517 | 1.18385  | 3.274357 |
| T3S15 | 3 | 24.3 | 7.64 | 825.454 | 12.99 | 97.7  | 116964000 | 30273000  | 456.6  | 0.058999 | 2.272586 | 3.249111 |
| T3S18 | 3 | 24.2 | 7.32 | 1006.63 | 5.95  | 99.5  | 196560000 | 117834000 | 229.5  | 0.057467 | 3.07065  | 2.796754 |
| T3S20 | 3 | 24.2 | 7.07 | 1353.73 | 7.93  | 94.2  | 400350000 | 95694000  | 494.4  | 0.120876 | 2.636184 | 3.457347 |
| T6S0  | 6 | 24.6 | 6.87 | 4.07941 | 4.34  | 116.9 | 702945000 | 55291500  | 702.9  | 3.056106 | 1.31744  | 3.419336 |
| T6S03 | 6 | 24.6 | 7.1  | 39.0393 | 4.085 | 115.3 | 208181250 | 18837000  | 401.85 | 2.924541 | 2.201943 | 2.825572 |
| T6S05 | 6 | 24.6 | 7.06 | 67.5268 | 4.851 | 118.7 | 271800000 | 63058500  | 795.6  | 2.470229 | 2.066033 | 2.837106 |
| T6S08 | 6 | 24.5 | 6.64 | 168.646 | 4.532 | 114.8 | 43832250  | 9610425   | 2304   | 2.413287 | 0.933618 | 2.260369 |
| T6S11 | 6 | 24.6 | 7.75 | 354.84  | 4.723 | 119.8 | 208692000 | 33484950  | 4824   | 2.119586 | 2.293485 | 3.38135  |
| T6S13 | 6 | 24.5 | 6.98 | 490.441 | 3.766 | 115.3 | 416790000 | 31560750  | 343.35 | 1.019819 | 2.148207 | 3.697428 |
| T6S15 | 6 | 24.6 | 6.82 | 708.085 | 5.68  | 116.9 | 329305500 | 28736100  | 756    | 0.342372 | 2.536009 | 3.906411 |
| T6S18 | 6 | 24.6 | 7.13 | 848.016 | 3.319 | 119   | 125055000 | 13992075  | 339.3  | 1.391766 | 2.218366 | 2.726809 |
| T6S20 | 6 | 24.5 | 6.95 | 1165.94 | 4.085 | 117.6 | 519975000 | 9024750   | 665.1  | 1.486213 | 2.467024 | 3.577321 |

**Table S5.** First 2 axes' values of a principal Coordinates Analysis (PCoA) computed using the eukaryotic operational taxonomic unit (OTU) table (the sequence data is available in Astorg *et al.* [6]).

| group | axis1     | axis2     |
|-------|-----------|-----------|
| T0    | -0.198837 | 0.257246  |
| T3S0  | -0.207731 | 0.261959  |
| T3S03 | -0.222076 | 0.238455  |
| T3S05 | -0.280860 | 0.278656  |
| T3S08 | -0.297501 | -0.419953 |
| T3S11 | -0.291871 | -0.518987 |
| T3S13 | -0.034741 | 0.044833  |
| T3S15 | 0.543059  | -0.033957 |
| T3S18 | 0.545052  | -0.033708 |
| T3S20 | 0.542808  | -0.032694 |
| T6S0  | -0.208055 | 0.279988  |
| T6S03 | -0.255759 | 0.325092  |
| T6S05 | -0.209272 | 0.210855  |
| T6S08 | -0.225563 | 0.184650  |
| T6S11 | -0.297997 | -0.445981 |
| T6S13 | -0.296064 | -0.510137 |
| T6S15 | 0.538738  | -0.033616 |
| T6S18 | 0.354396  | -0.029152 |
| T6S20 | 0.502275  | -0.023549 |



**Table S6.** Significant explanatory variables explaining bacterial mesocosm community composition variance, tested using distance-based redundancy analysis (db-RDA). Eukaryotic community composition was represented based on the scores of axes 1 and 2 (A1, A2) of a PCoA (see Table S5).

|                              | Df | SumOfSqs | F      | Pr(>F) |
|------------------------------|----|----------|--------|--------|
| Total Phosphorus             | 1  | 0.40077  | 2.1830 | 0.012  |
| Temperature                  | 1  | 0.41658  | 2.2691 | 0.017  |
| Salinity                     | 1  | 0.97199  | 5.2945 | 0.001  |
| pH                           | 1  | 0.20366  | 1.1094 | 0.317  |
| Dissolved oxygen             | 1  | 0.26580  | 1.4478 | 0.126  |
| Eukaryote community A1       | 1  | 0.55439  | 3.0198 | 0.001  |
| Eukaryote community A2       | 1  | 0.21777  | 1.1862 | 0.244  |
| Absolute abundance Eukaryote | 1  | 0.32528  | 1.7718 | 0.044  |
| Absolute abundance Bacteria  | 1  | 0.14999  | 0.8170 | 0.650  |
| Absolute abundance Archaea   | 1  | 0.22345  | 1.2171 | 0.244  |
| Chloride                     | 1  | 0.20694  | 1.1272 | 0.299  |
| Residual                     | 6  | 1.10151  |        |        |

**Table S7.** Variation in bacterial mesocosm community composition explained by exposure time (3 and 6 weeks) and salinity groups (K1, K2, K3, and K4) defined in the linkage tree (LINKTREE) analysis, tested using permutational multivariate analysis of variance (PERMANOVA).

|                     | Df | SumOfSqs | R2      | F      | Pr(>F) |
|---------------------|----|----------|---------|--------|--------|
| Exposure time       | 1  | 0.5952   | 0.11381 | 4.2359 | 0.002  |
| Salinity group      | 3  | 2.5743   | 0.49223 | 6.1067 | 0.001  |
| Exposure × Salinity | 1  | 0.3742   | 0.07154 | 2.6627 | 0.003  |
| Residual            | 12 | 1.6862   | 0.32242 |        |        |
| Total               | 17 | 5.2299   | 1.00000 |        |        |

**Table S8.** Similarity percentages (SIMPER) and Kruskal-Wallis analysis table showing the OTUs that are significantly different according to the clustering established by the PCoA. The table shows the compared Clusters, the result of the SIMPER analysis, the OTU group, the initial Kruskal-Wallis p-value (Krusk.p.val) and corrected for false discovery rate (Fdr.krusk. p.val), the taxonomy associated with OTU, the mean relative abundances and standard deviations associated with the two clusters compared.

| Clusters | SIMPER   | OTU   | Krusk p.val | fdr_krusk p.val | Taxonomy                                                                                                                              | Left mean abund | Left stdev | Right mean abund | Right stdev |
|----------|----------|-------|-------------|-----------------|---------------------------------------------------------------------------------------------------------------------------------------|-----------------|------------|------------------|-------------|
| K1 / K2  | 0.014965 | Otu05 | 0.011230    | 0.028075        | Bacteria(100);Actinobacteriota(100);Actinobacteria(100);Frankiales(100);Sporichthyaceae(100);Sporichthyaceae_unclassified(74);        | 0.025580        | 0.013154   | 0.002187         | 0.002308    |
| K1 / K2  | 0.011071 | Otu08 | 0.017960    | 0.038487        | Bacteria(100);Actinobacteriota(100);Actinobacteria(100);Micrococcales(100);Microbacteriaceae(100);Microbacteriaceae_unclassified(84); | 0.006505        | 0.002749   | 0.022223         | 0.012884    |
| K1 / K2  | 0.010568 | Otu04 | 0.027992    | 0.054367        | Bacteria(100);Actinobacteriota(100);Actinobacteria(100);Corynebacteriales(100);Mycobacteriaceae(98);Mycobacterium(98);                | 0.027225        | 0.007603   | 0.010748         | 0.006358    |

|         |          |       |          |          |                                                                                                                                                      |          |          |          |          |
|---------|----------|-------|----------|----------|------------------------------------------------------------------------------------------------------------------------------------------------------|----------|----------|----------|----------|
| K1 / K2 | 0.010234 | Otu03 | 0.090969 | 0.097467 | Bacteria(100);Actinobacteriota(100);Actinobacteria(100);Frankiales(100);Sporichthyaceae(100);hgcI_clade(88);                                         | 0.030314 | 0.023934 | 0.013330 | 0.005392 |
| K1 / K3 | 0.017633 | Otu12 | 0.005766 | 0.028075 | Bacteria(100);Proteobacteria(100);Alphaproteobacteria(100);Azospirillales(98);Azospirillaceae(98);Azospirillum(96);                                  | 0.000386 | 0.000803 | 0.029241 | 0.026043 |
| K1 / K3 | 0.016101 | Otu02 | 0.011230 | 0.028075 | Bacteria(100);Actinobacteriota(100);Actinobacteria(100);Frankiales(100);Sporichthyaceae(100);Sporichthyaceae_ge(75);                                 | 0.031136 | 0.016975 | 0.003542 | 0.001080 |
| K1 / K3 | 0.015186 | Otu03 | 0.011230 | 0.028075 | Bacteria(100);Actinobacteriota(100);Actinobacteria(100);Frankiales(100);Sporichthyaceae(100);hgcI_clade(88);                                         | 0.030314 | 0.023934 | 0.003578 | 0.000382 |
| K1 / K3 | 0.014947 | Otu08 | 0.011230 | 0.028075 | Bacteria(100);Actinobacteriota(100);Actinobacteria(100);Micrococcales(100);Microbacteriaceae(100);Microbacteriaceae_unclassified(84);                | 0.006505 | 0.002749 | 0.030731 | 0.014375 |
| K1 / K3 | 0.014221 | Otu10 | 0.026922 | 0.054367 | Bacteria(100);Proteobacteria(100);Gammaproteobacteria(100);Pseudomonadales(100);Moraxellaceae(100);Acinetobacter(100);                               | 0.005450 | 0.009761 | 0.027423 | 0.007042 |
| K1 / K3 | 0.013751 | Otu05 | 0.011230 | 0.028075 | Bacteria(100);Actinobacteriota(100);Actinobacteria(100);Frankiales(100);Sporichthyaceae(100);Sporichthyaceae_unclassified(74);                       | 0.025580 | 0.013154 | 0.002695 | 0.001554 |
| K1 / K3 | 0.012012 | Otu16 | 0.010897 | 0.028075 | Bacteria(100);Proteobacteria(100);Gammaproteobacteria(100);Burkholderiales(100);Comamonadaceae(100);Ideonella(62);                                   | 0.001776 | 0.001284 | 0.021082 | 0.019667 |
| K1 / K3 | 0.011699 | Otu01 | 0.017960 | 0.038487 | Bacteria(100);Proteobacteria(100);Gammaproteobacteria(100);Burkholderiales(100);Burkholderiaceae(100);Polynucleobacter(100)                          | 0.037327 | 0.012281 | 0.017277 | 0.007419 |
| K1 / K3 | 0.011290 | Otu11 | 0.005766 | 0.028075 | Bacteria(100);Proteobacteria(100);Alphaproteobacteria(100);Ferrovibrionales(85);Ferrovibrionales_unclassified(51);Ferrovibrionales_unclassified(51); | 0.000357 | 0.000627 | 0.018477 | 0.014816 |
| K1 / K3 | 0.011152 | Otu17 | 0.017179 | 0.038487 | Bacteria(100);Bacteroidota(100);Bacteroidia(100);Flavobacteriales(100);Flavobacteriaceae(100);Flavobacterium(100);                                   | 0.003852 | 0.008619 | 0.020506 | 0.013357 |
| K1 / K3 | 0.011143 | Otu07 | 0.011230 | 0.028075 | Bacteria(100);Actinobacteriota(100);Actinobacteria(100);Micrococcales(100);Microbacteriaceae(100);Candidatus_Planktoluna(82);                        | 0.019798 | 0.006877 | 0.001693 | 0.001004 |
| K1 / K4 | 0.021400 | Otu06 | 0.008903 | 0.028075 | Bacteria(100);Proteobacteria(100);Alphaproteobacteria(100);Rhizobiales(100);Beijerinckiaceae(100);Bosea(97);                                         | 0.000485 | 0.000542 | 0.039979 | 0.023661 |
| K1 / K4 | 0.017610 | Otu01 | 0.011230 | 0.028075 | Bacteria(100);Proteobacteria(100);Gammaproteobacteria(100);Burkholderiales(100);Burkholderiaceae(100);Polynucleobacter(100);                         | 0.037327 | 0.012281 | 0.003421 | 0.003080 |
| K1 / K4 | 0.017223 | Otu09 | 0.007290 | 0.028075 | Bacteria(100);Bacteroidota(100);Bacteroidia(100);Cytophagales(100);Spirosomaceae(100);Emticia(100);                                                  | 0.000415 | 0.000592 | 0.031707 | 0.004035 |
| K1 / K4 | 0.014792 | Otu03 | 0.011118 | 0.028075 | Bacteria(100);Actinobacteriota(100);Actinobacteria(100);Frankiales(100);Sporichthyaceae(100);hgcI_clade(88);                                         | 0.030314 | 0.023934 | 0.000662 | 0.001146 |
| K1 / K4 | 0.014346 | Otu02 | 0.011230 | 0.028075 | Bacteria(100);Actinobacteriota(100);Actinobacteria(100);Frankiales(100);Sporichthyaceae(100);Sporichthyaceae_ge(75);                                 | 0.031136 | 0.016975 | 0.002880 | 0.001848 |
| K1 / K4 | 0.012804 | Otu04 | 0.011230 | 0.028075 | Bacteria(100);Actinobacteriota(100);Actinobacteria(100);Corynebacteriales(100);Mycobacteriaceae(98);Mycobacterium(98);                               | 0.027225 | 0.007603 | 0.003363 | 0.000607 |
| K1 / K4 | 0.012714 | Otu05 | 0.011230 | 0.028075 | Bacteria(100);Actinobacteriota(100);Actinobacteria(100);Frankiales(100);Sporichthyaceae(100);Sporichthyaceae_unclassified(74);                       | 0.025580 | 0.013154 | 0.001286 | 0.001670 |
| K1 / K4 | 0.012432 | Otu11 | 0.005766 | 0.028075 | Bacteria(100);Proteobacteria(100);Alphaproteobacteria(100);Ferrovibrionales(85);Ferrovibrionales_unclassified(51);Ferrovibrionales_unclassified(51); | 0.000357 | 0.000627 | 0.023082 | 0.005709 |
| K1 / K4 | 0.010501 | Otu07 | 0.011118 | 0.028075 | Bacteria(100);Actinobacteriota(100);Actinobacteria(100);Micrococcales(100);Microbacteriaceae(100);Candidatus_Planktoluna(82);                        | 0.019798 | 0.006877 | 0.000255 | 0.000442 |
| K2 / K3 | 0.017999 | Otu02 | 0.049535 | 0.054367 | Bacteria(100);Actinobacteriota(100);Actinobacteria(100);Frankiales(100);Sporichthyaceae(100);Sporichthyaceae_ge(75);                                 | 0.029020 | 0.015371 | 0.003542 | 0.001080 |
| K2 / K3 | 0.017215 | Otu12 | 0.049535 | 0.054367 | Bacteria(100);Proteobacteria(100);Alphaproteobacteria(100);Azospirillales(98);Azospirillaceae(98);Azospirillum(96);                                  | 0.003000 | 0.002090 | 0.029241 | 0.026043 |
| K2 / K3 | 0.013107 | Otu01 | 0.126630 | 0.129508 | Bacteria(100);Proteobacteria(100);Gammaproteobacteria(100);Burkholderiales(100);Burkholderiaceae(100);Polynucleobacter(100);                         | 0.034943 | 0.013243 | 0.017277 | 0.007419 |
| K2 / K3 | 0.012202 | Otu10 | 0.126630 | 0.129508 | Bacteria(100);Proteobacteria(100);Gammaproteobacteria(100);Pseudomonadales(100);Moraxellaceae(100);Acinetobacter(100);                               | 0.009966 | 0.011963 | 0.027423 | 0.007042 |
| K2 / K3 | 0.012201 | Otu11 | 0.046302 | 0.054367 | Bacteria(100);Proteobacteria(100);Alphaproteobacteria(100);Ferrovibrionales(85);Ferrovibrionales_unclassified(51);Ferrovibrionales_unclassified(51); | 0.000318 | 0.000550 | 0.018477 | 0.014816 |
| K2 / K3 | 0.011948 | Otu17 | 0.049535 | 0.054367 | Bacteria(100);Bacteroidota(100);Bacteroidia(100);Flavobacteriales(100);Flavobacteriaceae(100);Flavobacterium(100);                                   | 0.002355 | 0.001029 | 0.020506 | 0.013357 |
| K2 / K3 | 0.010332 | Otu16 | 0.275234 | 0.275234 | Bacteria(100);Proteobacteria(100);Gammaproteobacteria(100);Burkholderiales(100);Comamonadaceae(100);Ideonella(62);                                   | 0.006549 | 0.004671 | 0.021082 | 0.019667 |
| K2 / K4 | 0.020949 | Otu06 | 0.049535 | 0.054367 | Bacteria(100);Proteobacteria(100);Alphaproteobacteria(100);Rhizobiales(100);Beijerinckiaceae(100);Bosea(97);                                         | 0.001684 | 0.001351 | 0.039979 | 0.023661 |
| K2 / K4 | 0.017946 | Otu01 | 0.049535 | 0.054367 | Bacteria(100);Proteobacteria(100);Gammaproteobacteria(100);Burkholderiales(100);Burkholderiaceae(100);Polynucleobacter(100)                          | 0.034943 | 0.013243 | 0.003421 | 0.003080 |
| K2 / K4 | 0.016387 | Otu09 | 0.046302 | 0.054367 | Bacteria(100);Bacteroidota(100);Bacteroidia(100);Cytophagales(100);Spirosomaceae(100);Emticia(100);                                                  | 0.002213 | 0.003833 | 0.031707 | 0.004035 |
| K2 / K4 | 0.015028 | Otu02 | 0.049535 | 0.054367 | Bacteria(100);Actinobacteriota(100);Actinobacteria(100);Frankiales(100);Sporichthyaceae(100);Sporichthyaceae_ge(75);                                 | 0.029020 | 0.015371 | 0.002880 | 0.001848 |
| K2 / K4 | 0.012593 | Otu11 | 0.046302 | 0.054367 | Bacteria(100);Proteobacteria(100);Alphaproteobacteria(100);Ferrovibrionales(85);Ferrovibrionales_unclassified(51);Ferrovibrionales_unclassified(51); | 0.000318 | 0.000550 | 0.023082 | 0.005709 |

|                |          |       |          |          |                                                                                                                                       |          |          |          |          |
|----------------|----------|-------|----------|----------|---------------------------------------------------------------------------------------------------------------------------------------|----------|----------|----------|----------|
| <b>K2 / K4</b> | 0.010729 | Otu08 | 0.049535 | 0.054367 | Bacteria(100);Actinobacteriota(100);Actinobacteria(100);Micrococcales(100);Microbacteriaceae(100);Microbacteriaceae_unclassified(84); | 0.022223 | 0.012884 | 0.003508 | 0.001603 |
| <b>K3 / K4</b> | 0.018689 | Otu09 | 0.049535 | 0.054367 | Bacteria(100);Bacteroidota(100);Bacteroidia(100);Cytophagales(100);Spirosomaceae(100);Emticicia(100);                                 | 0.001797 | 0.001961 | 0.031707 | 0.004035 |
| <b>K3 / K4</b> | 0.017284 | Otu12 | 0.049535 | 0.054367 | Bacteria(100);Proteobacteria(100);Alphaproteobacteria(100);Azospirillales(98);Azospirillaceae(98);Azospirillum(96);                   | 0.029241 | 0.026043 | 0.000637 | 0.000584 |
| <b>K3 / K4</b> | 0.016970 | Otu06 | 0.049535 | 0.054367 | Bacteria(100);Proteobacteria(100);Alphaproteobacteria(100);Rhizobiales(100);Beijerinckiaceae(100);Bosea(97);                          | 0.012505 | 0.006186 | 0.039979 | 0.023661 |
| <b>K3 / K4</b> | 0.016864 | Otu10 | 0.036904 | 0.054367 | Bacteria(100);Proteobacteria(100);Gammaproteobacteria(100);Pseudomonadales(100);Moraxellaceae(100);Acinetobacter(100);                | 0.027423 | 0.007042 | 0.000000 | 0.000000 |
| <b>K3 / K4</b> | 0.016599 | Otu08 | 0.049535 | 0.054367 | Bacteria(100);Actinobacteriota(100);Actinobacteria(100);Micrococcales(100);Microbacteriaceae(100);Microbacteriaceae_unclassified(84); | 0.030731 | 0.014375 | 0.003508 | 0.001603 |
| <b>K3 / K4</b> | 0.012075 | Otu16 | 0.046302 | 0.054367 | Bacteria(100);Proteobacteria(100);Gammaproteobacteria(100);Burkholderiales(100);Comamonadaceae(100);Ideonella(62);                    | 0.021082 | 0.019667 | 0.001393 | 0.001157 |
| <b>K3 / K4</b> | 0.011726 | Otu17 | 0.049535 | 0.054367 | Bacteria(100);Bacteroidota(100);Bacteroidia(100);Flavobacteriales(100);Flavobacteriaceae(100);Flavobacterium(100);                    | 0.020506 | 0.013357 | 0.001156 | 0.001194 |
| <b>K3 / K4</b> | 0.010544 | Otu27 | 0.036904 | 0.054367 | Bacteria(100);Bacteroidota(100);Bacteroidia(100);Chitinophagales(100);Chitinophagaceae(100);Edaphobaculum(100);                       | 0.000000 | 0.000000 | 0.017107 | 0.012023 |
